# Supplementary material
Source: PubMed Central journal article supplement (PMC3512001)
Supplement: mmc1.pdf [file mmc1.pdf]

Supplemental Data

Genetic Risk Factors for Type 2 Diabetes:

A *Trans*-Regulatory Genetic Architecture?

Steven C. Elbein, Eric R. Gamazon, Swapan K. Das, Neda Rasouli, Philip A. Kern, and Nancy J. Cox

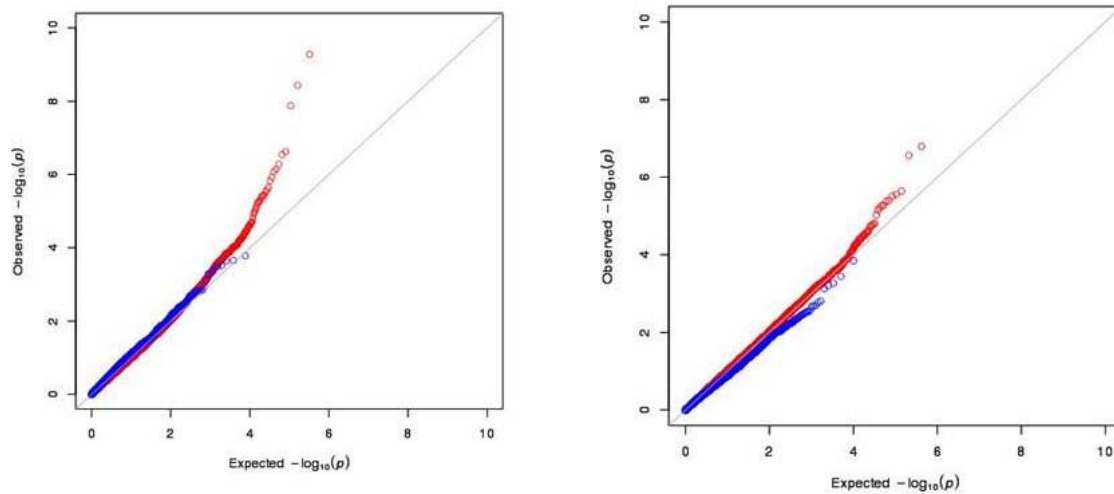

**Figure S1. Top SNP associations with T2D are enriched for *trans* regulatory variations for differentially expressed transcripts (FDR<0.05) between insulin sensitive and insulin resistant individuals.** For each tissue (adipose on the left, muscle on the right), shown here are the Q-Q plots for the distributions of p values for the *trans* and *cis* associations with transcripts differentially expressed between insulin sensitive and insulin resistant individuals (FDR<0.05)

among the top SNP associations with T2D ( $n = 1,000$ ) in the Wellcome Trust Case Control study. Red (blue) indicates the distribution of p values for all *trans* (*cis*, respectively) associations (with differentially expressed transcripts) among the top associations with T2D. The x-axis is the expected  $-\log_{10}(\text{p value})$  while the y-axis is the observed  $-\log_{10}(\text{p value})$ .

|                |           |           |    |
|----------------|-----------|-----------|----|
| ABCB11         | 169487694 | 169596078 | 2  |
| ABCC8          | 17371007  | 17455024  | 11 |
| ACP2           | 47217428  | 47226938  | 11 |
| ADAM30         | 120237678 | 120240635 | 1  |
| ADAMTS9        | 64476369  | 64648404  | 3  |
| ADCY5          | 124486088 | 124650081 | 3  |
| ARAP1          | 72073761  | 72115820  | 11 |
| ARFGAP2        | 47142427  | 47154994  | 11 |
| ART2P          | 71909642  | 71910331  | 11 |
| ATG16L2        | 72203098  | 72218327  | 11 |
| C11orf10       | 61313180  | 61316660  | 11 |
| C11orf9        | 61279436  | 61312564  | 11 |
| C12orf27       | 119893409 | 119894477 | 12 |
| C12orf43       | 119925230 | 119938682 | 12 |
| C2orf16        | 27652892  | 27659092  | 2  |
| C3orf65        | 186913773 | 186918648 | 3  |
| C8orf38        | 96106396  | 96140113  | 8  |
| CAMK2B         | 44225415  | 44331748  | 7  |
| CCDC121        | 27702009  | 27705382  | 2  |
| CCNE2          | 95961627  | 95976659  | 8  |
| CDC123         | 12277970  | 12332592  | 10 |
| CDKN1C         | 2861440   | 2863550   | 11 |
| CHCHD9         | 81196013  | 81196774  | 9  |
| CRY2           | 45825604  | 45861371  | 11 |
| CUGBP1         | 47446520  | 47531263  | 11 |
| DAGLA          | 61204485  | 61271048  | 11 |
| DDB2           | 47193088  | 47217338  | 11 |
| DKFZp686O24166 | 17328795  | 17355463  | 11 |
| DKFZp779M0652  | 45749558  | 45750484  | 11 |
| DNAJC5G        | 27351792  | 27357799  | 2  |
| DPY19L4        | 95801326  | 95873244  | 8  |
| EIF2B4         | 27440722  | 27446827  | 2  |
| EIF5A2         | 172088897 | 172109119 | 3  |
| EML2           | 50804497  | 50834508  | 19 |
| FADS1          | 61323678  | 61340885  | 11 |
| FADS2          | 61352288  | 61391400  | 11 |
| FADS3          | 61397573  | 61415581  | 11 |
| FAH            | 78232395  | 78265736  | 15 |
| FAM148A        | 60146467  | 60150407  | 15 |
| FAM148B        | 60243028  | 60244773  | 15 |

|              |           |           |    |
|--------------|-----------|-----------|----|
| FBXO46       | 50905726  | 50925990  | 19 |
| FEN1         | 61316725  | 61321285  | 11 |
| FES          | 89228712  | 89240009  | 15 |
| FLJ38723     | 60322241  | 60337310  | 15 |
| FNDC4        | 27568253  | 27571589  | 2  |
| FTHL3P       | 27468993  | 27469946  | 2  |
| FURIN        | 89212888  | 89227690  | 15 |
| G6PC2        | 169465995 | 169474755 | 2  |
| GCK          | 44150394  | 44195562  | 7  |
| GCKR         | 27573209  | 27600054  | 2  |
| GIPR         | 50863341  | 50877556  | 19 |
| GPN1         | 27705406  | 27727216  | 2  |
| GSTM1L       | 12274295  | 12274951  | 3  |
| GTF3C2       | 27402224  | 27433371  | 2  |
| GYLTL1B      | 45899771  | 45907222  | 11 |
| hCG_1776259  | 114820979 | 114821705 | 10 |
| hCG_1992539  | 17206273  | 17207420  | 11 |
| HDDC3        | 89275158  | 89276777  | 15 |
| HHEX         | 94439660  | 94445387  | 10 |
| HMGA2        | 64504506  | 64646337  | 12 |
| HMGCS2       | 120092524 | 120113040 | 1  |
| HNF1A        | 119900931 | 119924697 | 12 |
| HNF1B        | 33120546  | 33179208  | 17 |
| IDE          | 94203579  | 94323831  | 10 |
| IFT172       | 27520743  | 27566074  | 2  |
| IGF1         | 101313805 | 101398453 | 12 |
| IGF2BP2      | 186844220 | 187025520 | 3  |
| INTS8        | 95904709  | 95961896  | 8  |
| KCNJ11       | 17363370  | 17366781  | 11 |
| KCNQ1        | 2422796   | 2826915   | 11 |
| KCNQ1DN      | 2848502   | 2849688   | 11 |
| KCNQ1OT1     | 2674976   | 2675567   | 11 |
| KIF11        | 94342970  | 94405129  | 10 |
| KLF14        | 130068017 | 130069399 | 7  |
| KRTCAP3      | 27518766  | 27520667  | 2  |
| LOC100127949 | 72329190  | 72329804  | 11 |
| LOC100128036 | 172153341 | 172195364 | 3  |
| LOC100128081 | 28186471  | 28248398  | 7  |
| LOC100128150 | 130158497 | 130158809 | 7  |
| LOC100128217 | 14991339  | 15178594  | 7  |
| LOC100128354 | 92310256  | 92310483  | 11 |

|              |           |           |    |
|--------------|-----------|-----------|----|
| LOC100128548 | 95971840  | 95973547  | 8  |
| LOC100128609 | 43313004  | 43314100  | 2  |
| LOC100128970 | 17413794  | 17414303  | 11 |
| LOC100129287 | 76478148  | 76478746  | 5  |
| LOC100129473 | 61290975  | 61291562  | 11 |
| LOC100129623 | 6354314   | 6355893   | 4  |
| LOC100129726 | 43307509  | 43309436  | 2  |
| LOC100129940 | 64535926  | 64562087  | 12 |
| LOC100129972 | 60161935  | 60162797  | 15 |
| LOC100129995 | 27783665  | 27784535  | 2  |
| LOC100130098 | 96154017  | 96155024  | 8  |
| LOC100130191 | 89246451  | 89247656  | 15 |
| LOC100130981 | 27642441  | 27644312  | 2  |
| LOC100131061 | 89377085  | 89377462  | 15 |
| LOC100131297 | 89374360  | 89376774  | 15 |
| LOC100131326 | 61340577  | 61350557  | 11 |
| LOC100132702 | 89274413  | 89279354  | 15 |
| LOC100132907 | 120370655 | 120371066 | 1  |
| LOC143678    | 45884660  | 45885408  | 11 |
| LOC204010    | 64438300  | 64439043  | 12 |
| LOC283014    | 94418083  | 94419684  | 10 |
| LOC285484    | 6253074   | 6285983   | 4  |
| LOC347674    | 130157647 | 130158595 | 7  |
| LOC388553    | 50934793  | 50967601  | 19 |
| LOC390363    | 119826638 | 119837311 | 12 |
| LOC390638    | 89377463  | 89379247  | 15 |
| LOC642791    | 92287416  | 92293615  | 11 |
| LOC643550    | 119838829 | 119839424 | 12 |
| LOC643897    | 12086724  | 12087862  | 3  |
| LOC646736    | 226715694 | 226753594 | 2  |
| LOC728723    | 76418381  | 76470883  | 5  |
| LOC729983    | 22144357  | 22145867  | 9  |
| LOC730057    | 64651913  | 64704316  | 3  |
| LOC732199    | 17169270  | 17172540  | 11 |
| LOC767850    | 120197246 | 120198237 | 1  |
| MADD         | 47247534  | 47308157  | 11 |
| MAN2A2       | 89248423  | 89266818  | 15 |
| MAPK8IP1     | 45863777  | 45884591  | 11 |
| MGC40574     | 43307848  | 43309497  | 2  |
| MPV17        | 27385863  | 27399472  | 2  |
| MTNR1B       | 92342436  | 92355595  | 11 |

|              |           |           |    |
|--------------|-----------|-----------|----|
| MYBPC3       | 47309532  | 47330828  | 11 |
| MYL7         | 44144987  | 44147440  | 7  |
| NBPF7        | 120178910 | 120189301 | 1  |
| NOSTRIN      | 169367352 | 169429810 | 2  |
| NOTCH2       | 120255698 | 120413798 | 1  |
| NR1H3        | 47237308  | 47246971  | 11 |
| NRBP1        | 27504976  | 27518629  | 2  |
| NUCB2        | 17254861  | 17309645  | 11 |
| NUDT5        | 12249578  | 12278148  | 10 |
| OASL         | 119942477 | 119961162 | 12 |
| P2RX7        | 120055060 | 120108258 | 12 |
| PACSIN3      | 47155653  | 47164533  | 11 |
| PDE2A        | 71964832  | 72063059  | 11 |
| PEX16        | 45887795  | 45896181  | 11 |
| PLEKHF2      | 96215207  | 96238088  | 8  |
| PPARG        | 12304348  | 12450854  | 3  |
| PPM1G        | 27457564  | 27485999  | 2  |
| PPP2R2C      | 6373205   | 6525226   | 4  |
| PRC1         | 89310271  | 89338807  | 15 |
| PROX1        | 212228482 | 212276388 | 1  |
| PSMC3        | 47396895  | 47404599  | 11 |
| QPCTL        | 50887771  | 50899049  | 19 |
| RAB3IL1      | 61421348  | 61441572  | 11 |
| RAPSN        | 47415890  | 47427305  | 11 |
| RCCD1        | 89299109  | 89307358  | 15 |
| REG4         | 120138230 | 120155725 | 1  |
| RP11-145E5.4 | 21984789  | 22111093  | 9  |
| RPL22L1      | 172065357 | 172070738 | 3  |
| SEC22A       | 124403464 | 124474049 | 3  |
| SEC61A2      | 12211703  | 12246831  | 10 |
| SLC22A18AS   | 2864749   | 2877506   | 11 |
| SLC2A2       | 172196830 | 172227461 | 3  |
| SLC30A8      | 118216517 | 118258133 | 8  |
| SLC35C1      | 45783911  | 45791142  | 11 |
| SLC39A13     | 47386757  | 47394622  | 11 |
| SLC4A1AP     | 27739841  | 27771350  | 2  |
| SNORA47      | 76412014  | 76412151  | 5  |
| SNRPD2       | 50882557  | 50887281  | 19 |
| SNX17        | 27446892  | 27453497  | 2  |
| SPC25        | 169435646 | 169455189 | 2  |
| SPI1         | 47332984  | 47356702  | 11 |

|          |           |           |    |
|----------|-----------|-----------|----|
| STARD10  | 72143421  | 72182397  | 11 |
| SUPT7L   | 27727182  | 27739952  | 2  |
| SYN2     | 12020861  | 12208531  | 3  |
| TCF7L2   | 114700200 | 114916062 | 10 |
| THADA    | 43311478  | 43676688  | 2  |
| TIMP4    | 12169567  | 12175646  | 3  |
| TP53INP1 | 96007376  | 96030766  | 8  |
| TRIM54   | 27359103  | 27383810  | 2  |
| TSPAN8   | 69805143  | 69838045  | 12 |
| UCN      | 27383768  | 27384633  | 2  |
| UNC45A   | 89274413  | 89298326  | 15 |
| VPS13C   | 59931879  | 60139938  | 15 |
| VPS33B   | 89342777  | 89366836  | 15 |
| WFS1     | 6322477   | 6355892   | 4  |
| YKT6     | 44207102  | 44220417  | 7  |
| ZBED3    | 76408287  | 76418785  | 5  |
| ZFAND6   | 78139075  | 78217766  | 15 |
| ZFP36L2  | 43304209  | 43307248  | 2  |
| ZNF512   | 27659396  | 27699466  | 2  |
| ZNF513   | 27453605  | 27457096  | 2  |

**Table S1. Transcripts (n=183) near the SNPs (n=68) reproducibly associated with Type 2 diabetes and glucose homeostasis traits.** Genes are annotated by their start position, end position, and chromosome.

| <b>Gene</b>     | <b>SNP</b> | <b>P-value</b>         |
|-----------------|------------|------------------------|
| <i>MAPK8IP1</i> | rs2696490  | 7.18x10 <sup>-24</sup> |
| <i>TCF7L2</i>   | rs11198893 | 2.19x10 <sup>-11</sup> |
| <i>SEC61A2</i>  | rs12935562 | 2.12x10 <sup>-10</sup> |
| <i>PPP2R2C</i>  | rs3765618  | 4.78x10 <sup>-10</sup> |
| <i>KRTCAP3</i>  | rs1647266  | 1.71x10 <sup>-7</sup>  |
| <i>SUPT7L</i>   | rs2178197  | 7.10x10 <sup>-10</sup> |
| <i>VPS33B</i>   | rs7403304  | 9.86x10 <sup>-7</sup>  |
| <i>SYN2</i>     | rs13089415 | 3.8x10 <sup>-8</sup>   |
| <i>OASL</i>     | rs959398   | 1.94x10 <sup>-8</sup>  |
| <i>KRTCAP3</i>  | rs35980734 | 2.9x10 <sup>-10</sup>  |

**Table S2. eQTLs for adipose transcripts near T2D/GT SNPs.**



| <b>Gene</b>     | <b>SNP</b> | <b>P-value</b>         |
|-----------------|------------|------------------------|
| <i>MAPK8IP1</i> | rs2696490  | $3.5 \times 10^{-17}$  |
| <i>C11orf9</i>  | rs2278210  | $5.4 \times 10^{-12}$  |
| <i>GTF3C2</i>   | rs7733988  | $1.12 \times 10^{-10}$ |

**Table S3. eQTLs for muscle transcripts near T2D/GT SNPs.**

| <b>T2D/GT SNP</b> | <b>P-value</b> | <b>Transcript</b> | <b>P-value (IR vs IS)</b> |
|-------------------|----------------|-------------------|---------------------------|
| rs2881654         | 0.0001079      | PRO0478           | 0.000069                  |
| rs2881654         | 0.0008118      | GGT6              | 0.000153                  |
| rs7041847         | 8.03E-05       | MRPS6             | 0.00094                   |
| rs7041847         | 0.0008064      | MRPS6             | 0.00094                   |
| rs2881654         | 0.000574       | HDAC10            | 0.00101                   |
| rs7041847         | 3.71E-05       | CHMP1A            | 0.00183                   |

**Table S4. Muscle transcripts associated with established T2D/GT SNPs and differentially expressed between insulin sensitive and insulin resistant individuals.** Differentially expressed transcripts are defined as FDF<0.05. SNP-transcript p-values are also shown.

| <b>T2D/GT SNP</b> | <b>P-value</b> | <b>Transcript</b> | <b>P-value (IR vs IS)</b> |
|-------------------|----------------|-------------------|---------------------------|
| rs4712523         | 0.0005294      | SMG1              | 4.04E-08                  |
| rs4712523         | 0.0001706      | EAF1              | 5.15E-08                  |
| rs4712523         | 0.0004362      | DSCR3             | 6.09E-08                  |
| rs4712523         | 0.0005059      | MRPS30            | 0.000000896               |
| rs2881654         | 0.0007216      | CRTAP             | 0.00000305                |
| rs4244883         | 0.0001909      | VPS26B            | 0.00000497                |
| rs4712523         | 0.0003233      | HK2               | 0.00000945                |
| rs13089415        | 0.000478       | TTC7B             | 0.0000107                 |
| rs243083          | 0.0006411      | TTC7B             | 0.0000107                 |
| rs6931514         | 0.0003618      | HNRPA3            | 0.0000171                 |
| rs6931514         | 0.0005643      | HNRPA3            | 0.0000171                 |
| rs2881654         | 0.000184       | REEP3             | 0.0000633                 |
| rs8034335         | 0.0008804      | SETD2             | 0.000172                  |
| rs4411878         | 0.0002174      | KIF1B             | 0.000243                  |
| rs174576          | 0.000596       | FXD5              | 0.000384                  |
| rs11138147        | 0.0002779      | CFHR1             | 0.000389                  |
| rs7845219         | 0.0004327      | MMP9              | 0.00332                   |
| rs4411878         | 0.000878       | GPAM              | 0.00452                   |
| rs4712523         | 0.0009177      | GPAM              | 0.00452                   |
| rs8034335         | 0.0001591      | ADIPOR2           | 0.00485                   |
| rs2881654         | 0.0001606      | PHF20L1           | 0.00818                   |
| rs11603334        | 0.000284       | PHF20L1           | 0.00818                   |
| rs4731702         | 0.0004683      | PDK4              | 0.0184                    |
| rs2881654         | 7.58E-05       | C13orf1           | 0.0551                    |

**Table S5. Adipose transcripts associated with established T2D/GT SNPs and differentially expressed between insulin sensitive and insulin resistant individuals.** Differentially expressed transcripts are defined as FDF<0.05. SNP-transcript p-values are also shown. We found that transcripts nominally associated with T2D/GT ( $p<10^{-3}$ ) are more likely to be differentially expressed between IR and IS individuals than transcripts associated, at the same nominal level of significance, with a random set of allele frequency matched SNPs.
